# Supplementary material
Source: publisher site journal article supplement (https://static.cambridge.org/content/id/urn:cambridge.org:id:article:S1368980020002505/resource/name/S1368980020002505supp001.docx)
Supplement: Supplementary file 1 [file S1368980020002505supp001.docx]

**Supplemental file 2:** Average shelf-space (m2) of selected categories of healthy and discretionary food, by supermarket group, in a sample of 104 Australian supermarkets in 2019.

| Food category | Coles  n=26 | | | | Woolworths  n=26 | | | ALDI  n=26 | | | | ‘Independent’  n=26 | | | |
| --- | --- | --- | --- | --- | --- | --- | --- | --- | --- | --- | --- | --- | --- | --- | --- |
|  | Mean | | SD | | Mean | | SD | Mean | | SD | | | Mean | | SD |
| Fruit and Vegetables: | |  | |  | |  | | |  | |  | | |  | |
| Frozen fruit | 2.68 | | 0.96 | | 3.07 | | 0.99 | 1.72 | | 0.48 | | | 0.24 | | 0.29 |
| Frozen vegetables | 8.34 | | 3.77 | | 6.41 | | 2.91 | 4.10 | | 1.53 | | | 2.89 | | 2.41 |
| Refrigerated fruit and vegetables | 21.75 | | 6.54 | | 27.83 | | 7.32 | 8.32 | | 1.54 | | | 8.01 | | 5.85 |
| Fruit and vegetables in display bins* | 46.30 | | 20.21 | | 38.77 | | 11.14 | 17.18 | | 4.47 | | | 17.49 | | 24.60 |
| Discretionary food categories: | |  | |  | |  | | |  | |  | | |  | |
| Chocolate and confectionery | 34.89 | | 9.51 | | 36.59 | | 8.93 | 10.16 | | 0.78 | | | 14.75 | | 8.86 |
| Chips (crisps) | 37.24 | | 11.79 | | 35.52 | | 8.14 | 12.98 | | 2.14 | | | 12.43 | | 7.27 |
| Sweet biscuits | 15.61 | | 3.72 | | 19.24 | | 4.93 | 7.65 | | 0.82 | | | 8.91 | | 7.48 |
| Soft drinks and energy drinks | 37.85 | | 10.37 | | 35.44 | | 8.37 | 12.67 | | 3.16 | | | 17.15 | | 10.97 |
| Ice-cream | 16.62 | | 4.26 | | 15.98 | | 4.34 | 12.18 | | 2.60 | | | 7.05 | | 5.82 |

*Excluding fruit and vegetable display bins on promotion. Promotional display bins are classified as island bins.
